# Supplementary material
Source: publisher figshare collection journal article supplement (https://tandf.figshare.com/ndownloader/files/15460082)
Supplement: Supplementary file 1 [file 15460082]

# Supplementary material

**Table S1. Details on the number of hospitalisations**

| **Number of hospitalisation** | **Safety intervention (N=168)** | **Standard management (N=167)** |
| --- | --- | --- |
| 0 | 27 (16.1%) | 17 (10.2%) |
| 1 | 34 (20.2%) | 41 (24.6%) |
| 2 | 20 (11.9%) | 20 (12.0%) |
| 3 | 18 (10.7%) | 18 (10.8%) |
| 4 | 17 (10.1%) | 12 (7.2%) |
| 5 | 15 (8.9%) | 10 (6.0%) |
| 6 | 10 (6.0%) | 11 (6.6%) |
| 7 | 2 (1.2%) | 10 (6.0%) |
| 8 | 5 (3.0%) | 7 (4.2%) |
| 9 | 4 (2.4%) | 6 (3.6%) |
| 10 | 2 (1.2%) | 2 (1.2%) |
| >11 | 14 (8.3%) | 13 (7.8%) |

**Analysis of missing data**

There were around 27% of patients who had missing data on utility scores either at month 12 or month 24 (Appendix 2 table 1), therefore multiple imputation was undertaken to examine the impact of missingness on the base case analysis. The missing-at-random assumption was tested using the logit regression analysis on the pattern of missingness. Multiple imputations were used to replace the missing values (missing EQ-5D-3L data at various time points) with plausible estimates and generated 30 datasets. Results were provided as pooled estimates of these sets.

**Table S2. Proportion of patients with missing data on EQ-5D-3L**

|  | Safety intervention (N=168) | Standard management (N=167) |
| --- | --- | --- |
| Baseline EQ-5D-3L | 2 (1.19%) | 8 (4.79%) |
| 12m EQ-5D-3L | 47 (27.98%) | 45 (26.95%) |
| 24m EQ-5D-3L | 44 (26.19%) | 49 (29.34%) |

The test around the missing pattern did not indicate a violation of the missing-at-random assumption (Appendix 2 table 2). The mean EQ-5D-3L utility at baseline (0.73846 vs 0.73845 in the Safety intervention and standard management groups), 12 months (0.75230 vs 0.75237) and 24 months (0.60707 vs 0.60708) based on the imputed data all did not show significant difference between two interventional groups, supporting a non-significant between-group difference in QALYs.

**Table S3. Missing pattern analysis based on logit regression**

| **Utility weights with missing data** | **Predictor of missingness** |
| --- | --- |
| Baseline EQ-5D-3L | Random status (p=0.065) |
| 12m EQ-5D-3L | Total admission (p=0.01), Total stay (p=0.001) |
| 24m EQ-5D-3L | Total admission (p=0.1), Total stay (p=0.1) |
